# Supplementary material for: Electrostatically-sprayed carbon electrodes for high performance organic complementary circuits
Source: PubMed Central journal article supplement (PMC9546853; doi:10.1038/s41598-022-19387-y), 2022-10-07
Supplement: 41598_2022_19387_MOESM1_ESM.pdf [file 41598_2022_19387_MOESM1_ESM.pdf]

## Supplementary information

# Electrostatically-sprayed carbon electrodes for high performance organic complementary circuits

Kazuyoshi Watanabe<sup>1\*</sup>, Naoki Miura<sup>2</sup>, Hiroaki Taguchi<sup>2</sup>, Takeshi Komatsu<sup>2</sup>, Hideyuki Nosaka<sup>2</sup>, Toshihiro Okamoto<sup>1,3,4</sup>, Shun Watanabe<sup>1,3\*</sup> & Jun Takeya<sup>1,3,5\*</sup>

<sup>1</sup> Department of Advanced Materials Science, Graduate School of Frontier Sciences, The University of Tokyo, 5-1-5 Kashiwanoha, Kashiwa, Chiba, 277-8561, Japan.

<sup>2</sup> NTT Device Technology Laboratories, Nippon Telegraph and Telephone (NTT) Corporation, 3-1 Morinosato-Wakamiya, Atsugi, Kanagawa, 243-0198, Japan.

<sup>3</sup> Material Innovation Research Center (MIRC), Graduate School of Frontier Sciences, The University of Tokyo, Kashiwa, Chiba 277-8561, Japan

<sup>4</sup> Precursory Research For Embryonic Science and Technology (PRESTO), Japan Science and Technology Agency (JST), Kawaguchi, Saitama 332-0012, Japan

<sup>5</sup> International Center for Materials Nanoarchitectonics (WPI-MANA), National Institute for Materials Science (NIMS), Tsukuba 305-0044, Japan

\* Corresponding authors: Kazuyoshi Watanabe (kaz-watanabe@edu.k.u-tokyo.ac.jp); Shun Watanabe (swatanabe@edu.k.u-tokyo.ac.jp); Jun Takeya (takeya@k.u-tokyo.ac.jp).

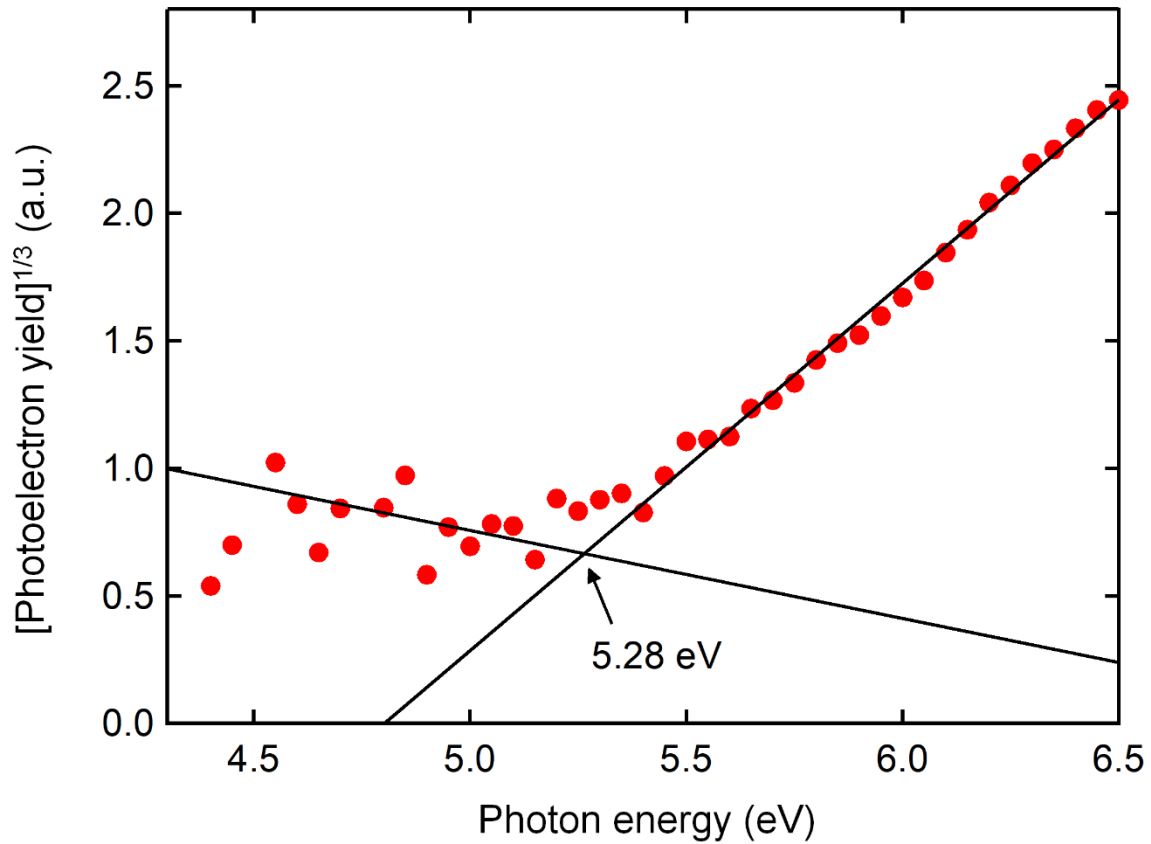

**Supplementary Figure 1. Ionization potential of graphite-based carbon resulting from photoelectron yield spectroscopy (PYS).** The carbon suspension XC-9089 was electrostatically sprayed on a glass substrate and then dried at 80°C for 30 min to obtain film-like carbon sample. The PYS measurement was carried out under vacuum.
